# Supplementary material
Source: PubMed Central journal article supplement (PMC6827296)
Supplement: supp_RA119.010628_155178_1_supp_395256_pxwscy.pdf [file supp_RA119.010628_155178_1_supp_395256_pxwscy.pdf]

## Supporting Information

Prospecting for  $\alpha$ -N-acetylgalactosaminidases yields a new class of GH31 O-glycanase

**Peter Rahfeld<sup>1,3,#,\*</sup>, Jacob F. Wardman<sup>3,4,#</sup>, Kevin Mehr<sup>1,3</sup>, Drew Huff<sup>1,3</sup>, Connor Morgan-Lang<sup>2,5</sup>,  
Hong-Ming Chen<sup>1</sup>, Steven J. Hallam<sup>2,5,6,7</sup> and Stephen G. Withers<sup>1,3,4,\*</sup>**

From the <sup>1</sup>Dept. of Chemistry, University of British Columbia, 2036 Main Mall, Vancouver, B.C. V6T1Z; <sup>2</sup>Dept. of Microbiology and Immunology, University of British Columbia, 2350 Health Sciences Mall, Life Sciences Centre, Vancouver, B.C. V6T1Z3; <sup>3</sup> Michael Smith Laboratories, University of British Columbia, 2185 East Mall, Vancouver, B.C. V6T1Z4; <sup>4</sup>Dept. of Biochemistry and Molecular Biology, University of British Columbia, 2350 Health Sciences Mall, Life Sciences Centre, Vancouver, B.C. V6T1Z3; <sup>5</sup>Graduate Program in Bioinformatics, University of British Columbia, Genome Sciences Centre, 100- 570 West 7th Avenue, Vancouver, BC, Canada; <sup>6</sup>ECOSCOPE Training Program, University of British Columbia, Vancouver, BC, Canada V6T 1Z3; <sup>7</sup>Peter Wall Institute for Advanced Studies, University of British Columbia, Vancouver, BC, Canada, V6T 1Z1

\*To whom correspondence should be addressed: Stephen G. Withers ([withers@chem.ubc.ca](mailto:withers@chem.ubc.ca)) or Peter Rahfeld ([prahfeld@chem.ubc.ca](mailto:prahfeld@chem.ubc.ca)) : Department of Chemistry, University of British Columbia, 2036 Main Mall, Vancouver, B.C. V6T1Z; Tel. (604) 822 3402

# These authors contributed equally.

### File contents:

Supporting information, Table S1  
Supporting information, Table S2  
Supporting information, Table S3  
Supporting information, Table S4  
Supporting information, Figure S1  
Supporting information, Figure S2  
Supporting information, Figure S3  
Supporting information, Figure S4  
Supporting information, Figure S5  
Supporting information, Figure S6  
Supporting information, Figure S7  
Supporting information, Figure S8  
Supporting information, Figure S9  
Supporting information, Figure S10

**Table S1. Accession numbers of proteins characterized in this study.**

| Name              | GH family | Database hit                       | Accession #    | Hit # | Organism                       |
|-------------------|-----------|------------------------------------|----------------|-------|--------------------------------|
| <i>Bc</i> GH31    | GH31      | DUF5110 domain-containing protein  | WP_005682123.1 | A2    | <i>Bacteroides caccae</i>      |
| <i>Bp</i> GH31    | GH31      | DUF5110 domain-containing protein  | WP_007559952.1 | O1    | <i>Bacteroides plebeius</i>    |
| <i>Bv</i> GH109_1 | GH109     | gfo/Idh/MocA family oxidoreductase | WP_005848863.1 | A1    | <i>Bacteroides vulgatus</i>    |
| <i>Cp</i> GH31    | GH31      | DUF4968 domain-containing protein  | WP_011590658.1 |       | <i>Clostridium perfringens</i> |

**Table S2. Kinetic parameters for the hydrolysis of GalNAc- $\alpha$ -MU by truncated and full-length *Bc*GH31, *Bp*GH31 and *Bv*GH109\_1.** Reactions were carried out in 50 mM HEPES pH 7.0 at 37°C and observed via fluorescence (ex 360 nm/ em 450 nm). Kinetic parameters were obtained by fitting initial velocities obtained from three replicate assays to the Michaelis-Menten equation using GraFit. Values indicate averages  $\pm$  standard error (n=3).

| Enzyme                   | $k_{cat}$<br>(s <sup>-1</sup> ) | $K_m$<br>( $\mu$ M) | $k_{cat}/K_m$<br>(s <sup>-1</sup> mM <sup>-1</sup> ) |
|--------------------------|---------------------------------|---------------------|------------------------------------------------------|
| <b>t<i>Bc</i> GH31</b>   | 2.08 $\pm$ 0.03                 | 236 $\pm$ 8         | 8.8 $\pm$ 0.3                                        |
| <b><i>Bc</i> GH31</b>    | 1.09 $\pm$ 0.01                 | 154 $\pm$ 5         | 7.08 $\pm$ 0.2                                       |
| <b>t<i>Bp</i> GH31</b>   | 4.4 $\pm$ 0.2                   | 160 $\pm$ 20        | 27 $\pm$ 3                                           |
| <b><i>Bp</i> GH31</b>    | 1.42 $\pm$ 0.02                 | 144 $\pm$ 6         | 9.9 $\pm$ 0.4                                        |
| <b><i>Bv</i> GH109_1</b> | 1.25 $\pm$ 0.04                 | 1.1 $\pm$ 0.2       | 1100 $\pm$ 200                                       |

**Table S3. Primers used in this study.**

| Primer Name                   | Sequence                                                | Purpose                                                                              |
|-------------------------------|---------------------------------------------------------|--------------------------------------------------------------------------------------|
| tBcGH31woSig_Eco31I_fwd       | ATGGTCTC G CCAT GTC ATT GTC GAT ACT GGT AGA AAT G       | Cloning of tBcGH31 into pET28a                                                       |
| tBcGH31_Eco31I_fwd            | ATGGTCTC G ATTC TTA CTC GAG GGG ATC GGA CTT GG          |                                                                                      |
| tBpGH31woSig_Eco31I_fwd       | ATGGTCTC G CCAT GCA CAG CAG ACT GAG ATA ACT ATC         | Cloning of tBpGH31 into pET28a                                                       |
| tBpGH31_Eco31I_fwd            | ATGGTCTC G ATTC TTA TTC CAA CGG ATC TGA TTT AGT AGT AGC |                                                                                      |
| pET28_Eco31I_fwd              | ATGGTCTC C GAAT TCGA GCT CCG TCG AC                     | Amplification of pET28a for insertion of tBcGH31 and tBpGH31                         |
| pET28_Eco31I_rev              | ATGGTCTC G ATGG CT GCC GCG CGG CAC                      |                                                                                      |
| Bc_c_term_PIPE_fwd            | AAGTCCGATCCCCTCGA ATTTGCTATCCGTGGTATCAGG                | Attachment of synthesised C-terminus of BcGH31                                       |
| Bc_c_term_PIPE_rev            | TA GGTCTC G TGAT AT TTA CTGAACCCCGATCTACG               |                                                                                      |
| Bp_c_term_PIPE_fwd            | CTAGATCCGTTGGAA TTCGCCATTTCATGGAAT                      | Attachment of synthesised C-terminus of BpGH31                                       |
| Bp_c_term_PIPE_rev            | TA GGTCTC G TGAT AT TCAAAACTTCACTGTATTTCAGATT           |                                                                                      |
| Bc_N_term_PIPE_rev            | TACCACGGATAGCAAAT TCGAGGGGATCGGACTTGGTC                 | Amplification of pET28a tBcGH31 for attachment of C-terminus                         |
| Bp_N_term_PIPE_rev            | ATTCCATGAATGGCGAA TTCCAACGGATCTGATTTAGTAGTAGC           | Amplification of pET28a tBpGH31 for attachment of C-terminus                         |
| Bcp_Nterm_PIPE_fwd            | AT ATCA CGAGACCTA TCGA GCT CCG TCG ACAAGC               | Amplification of pET28a tBc/tBpGH31 and attachment of C-termini of BcGH31 and BpGH31 |
| BpGH31_D465A_fwd              | C TGG TCG GGC GCC CAG ACT GGA GGT GAA                   | For site-directed mutagenesis of putative catalytic acid/base of BpGH31              |
| BpGH31_D465G_fwd              | C TGG TCG GGC GGC CAG ACT GGA GGT GAA                   |                                                                                      |
| BpGH31_D465S_fwd              | C TGG TCG GGC TCC CAG ACT GGA GGT GAA                   |                                                                                      |
| BpGH31_D465A_rev              | C TCC AGT CTG GGC GCC CGA CCA GAT ACC                   |                                                                                      |
| BpGH31_D465G_rev              | C TCC AGT CTG GCC GCC CGA CCA GAT ACC                   |                                                                                      |
| BpGH31_D465S_rev              | C TCC AGT CTG GGA GCC CGA CCA GAT ACC                   |                                                                                      |
| BpGH31_D413A_fwd              | G TTG AAA ACC GCC GTA GCC TGG GTA GGA G                 | For site-directed mutagenesis of putative catalytic nucleophile of BpGH31            |
| BpGH31_D413A_rev              | C CCA GGC TAC GGC GGT TTT CAA CAC ACG                   |                                                                                      |
| BpGH31_D413G_fwd              | G TTG AAA ACC GGC GTA GCC TGG GTA GGA G                 |                                                                                      |
| BpGH31_D413G_rev              | C CCA GGC TAC GCC GGT TTT CAA CAC ACG                   |                                                                                      |
| BpGH31_D413S_fwd              | G TTG AAA ACC AGC GTA GCC TGG GTA GGA G                 |                                                                                      |
| BpGH31_D413S_rev              | C CCA GGC TAC GCT GGT TTT CAA CAC ACG                   |                                                                                      |
| CpGH31_NoSignalPeptide_33_fwd | CCGCGCGGCAGCCAT TTTCCAACAGAAGGGATAAA                    | Cloning of CpGH31 33-933 from <i>C. perfringens</i> DSM 798 genomic DNA into pET28a  |
| CpGH31_NoCBM_933_rev          | GTCGACGGAGCTCGA TCTTACACGATAACTATATTC                   |                                                                                      |
| pET28A_CpGH31_PIPE_fwd        | TAGTTATCGTGTAAGA TCGAGCTCCGTCGACAAGCT                   | Amplification of pET28a for insertion of CpGH31                                      |
| pET28A_CpGH31_PIPE_rev        | CCCTTCTGTTGGAAA ATGGCTGCCGCGCGGCACCA                    |                                                                                      |
| BvGH109_NdeI_F_27aaNtermDel   | GAG CTC GAG TTA TTT TGC TTC TTT AGC CCA TTC TTT CGC     | Cloning of BvGH109_1 into pET16b                                                     |
| BvGH109_OEPCR_XhoI_R          | GAG CTC GAG TTT TGC TTC TTT AGC CCA TTC TTT CGC         |                                                                                      |

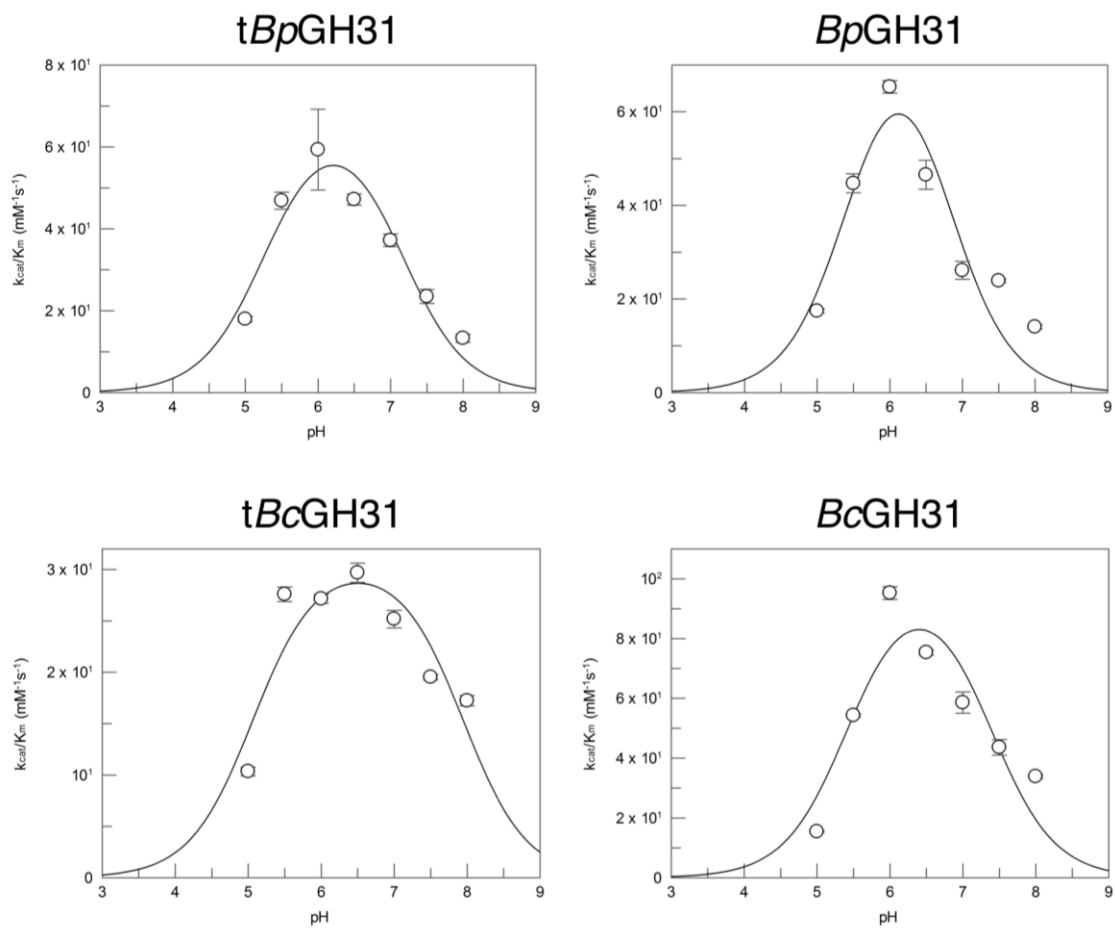

**Figure S1. pH activity profiles of GH31 enzymes.** Michaelis-Menten kinetic parameters ( $k_{cat}/K_M$ ) values were extracted substrate depletion assays using GraFit 7.0 and fit to an expression for the pH dependence of an enzyme with two essential ionizations using GraFit 7.0. All enzymes tested had similar ionizations with  $pK_a$  values at approximately 5.3 and 7.1, with the exception being the slightly broader profile of *tBcGH31* with  $pK_a$  values of 5.0 and 7.9. Error bars indicate standard error (n=3-6).

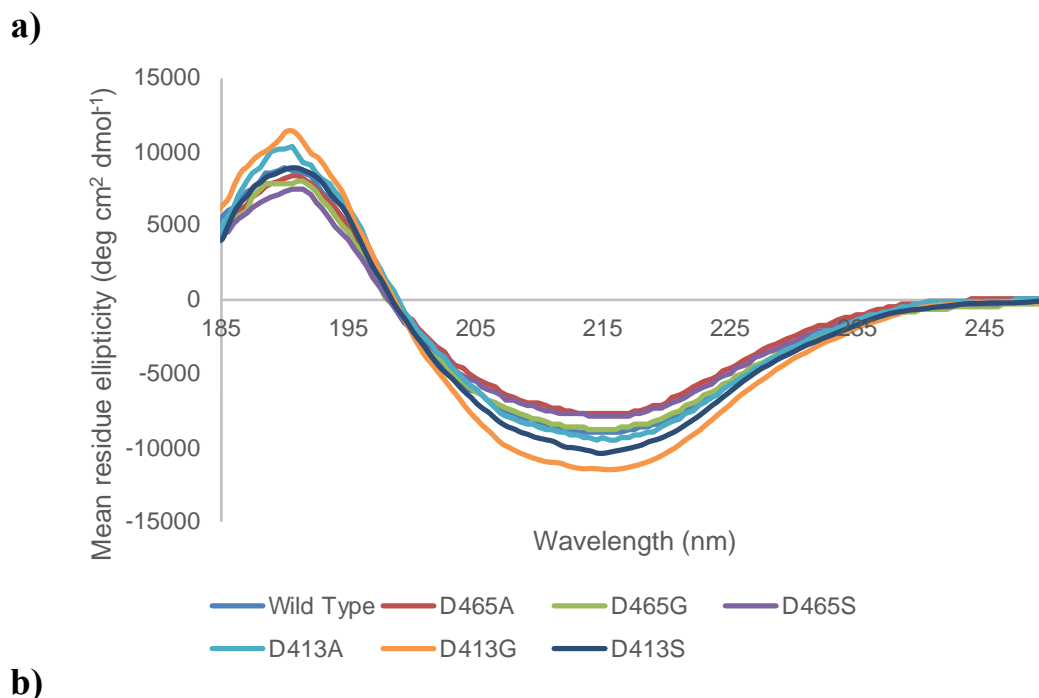

**b)**

| Enzyme               | %Helix | %Beta | %Turn | %Random | Total |
|----------------------|--------|-------|-------|---------|-------|
| <b>tBpGH31 WT</b>    | 25.9   | 27.4  | 12.5  | 32.1    | 97.9  |
| <b>tBpGH31 D413A</b> | 19.7   | 31    | 12.5  | 31.6    | 94.8  |
| <b>tBpGH31 D413G</b> | 17.4   | 35.3  | 12.5  | 32.9    | 98.1  |
| <b>tBpGH31 D413S</b> | 19.5   | 30.2  | 12.5  | 33      | 95.2  |
| <b>tBpGH31 D465A</b> | 28.5   | 23.8  | 12.5  | 31.3    | 96.1  |
| <b>tBpGH31 D465G</b> | 25.5   | 23.7  | 12.5  | 33.5    | 95.2  |
| <b>tBpGH31 D465S</b> | 23.8   | 28.9  | 12.5  | 32.7    | 97.9  |

**Figure S2. *tBpGH31* catalytic mutants have similar secondary structure as determined by far-UV CD-spectroscopy.** **a)** Far-UV CD-spectroscopy of the *tBpGH31* catalytic mutants. Each curve represents a total of 20 accumulations of CD-spectra of 0.075 mg/mL mutant or wild-type *tBpGH31* in 5 mM phosphate pH 7 after smoothing. **b)** Data from far-UV CD experiments were analyzed using the method described by Raussens *et al.* (1) through the available web server.

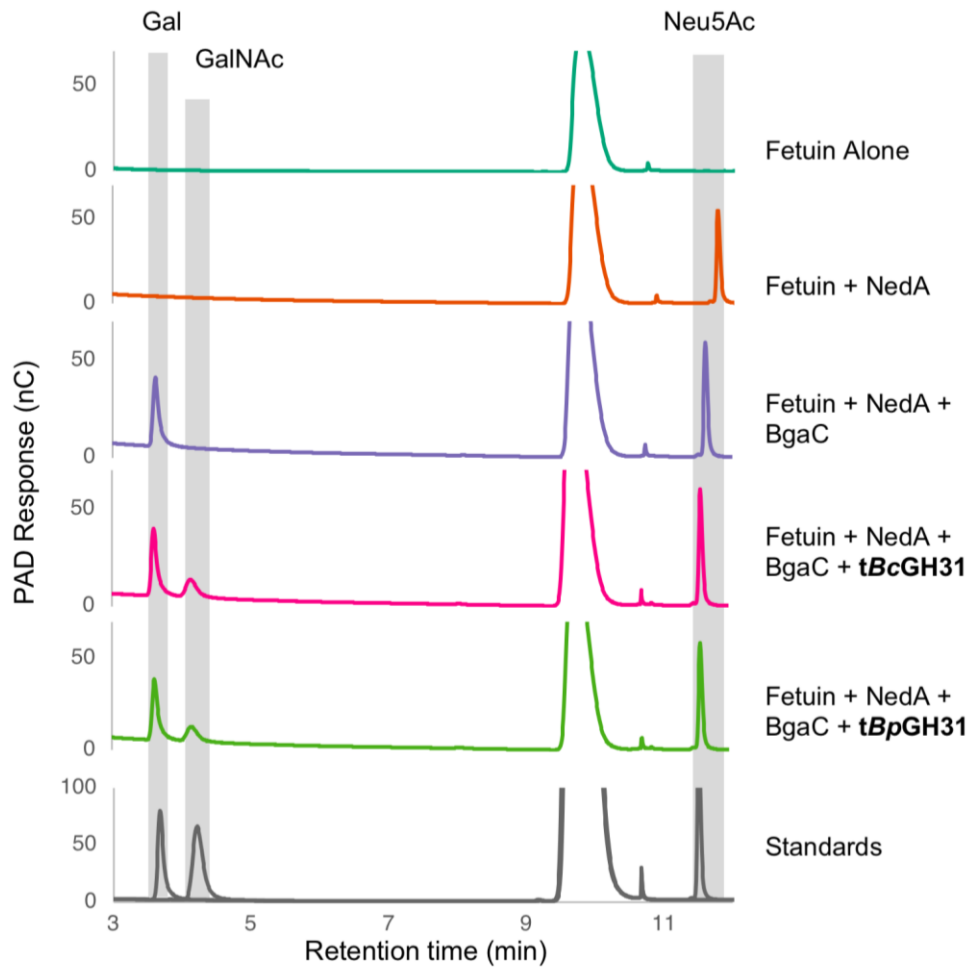

**Figure S3. Truncated  $\alpha$ -GalNAcase GH31 enzymes show exo-cleavage of O-glycans from fetuin.** Native fetuin was subjected to overnight enzymatic cleavage of glycans by sequential activity of a neuraminidase (NedA),  $\beta$ -1,3-galactosidase (BgaC), and exo- $\alpha$ -GalNAcases (*tBcGH31* or *tBpGH31*). Cleavage products were then separated and analyzed via HPAEC-PAD. Sugars were identified based on buffer (20 mM HEPES pH 7, 150 mM NaCl) spiked with free Neu5Ac, Gal and GalNAc. Some variations in the elution time accrued during the HPAEC-PAD runs, and so the identity of the released sugars have been assigned with allowance for these variations.

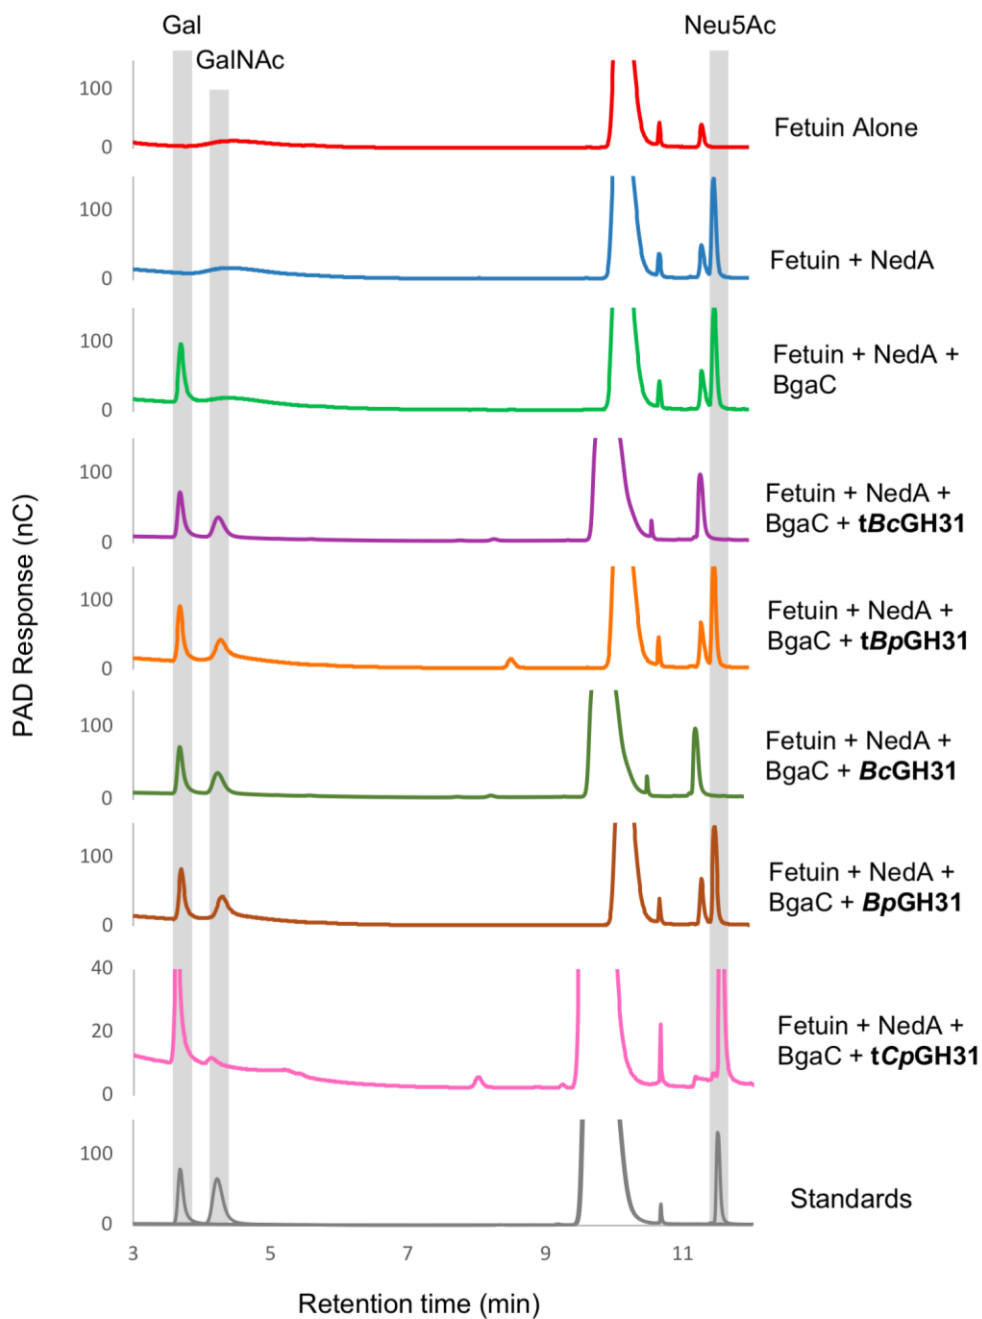

**Figure S4. Exo- $\alpha$ -GalNAcase GH31s are active on denatured fetuin.** Fetuin was denatured as described in the text and then subjected to overnight enzymatic cleavage of glycans by sequential activity of a neuraminidase (NedA),  $\beta$ -galactosidase (BgaC), and truncated and full-length exo- $\alpha$ -GalNAcase *BpGH31* and *BcGH31*, as well as the GH domain of *CpGH31* (*tCpGH31*). Cleavage products were then separated and analyzed via HPAEC-PAD. All tested GH31s were able to cleave GalNAc from denatured fetuin. Sugars were identified based on buffer spiked with Neu5Ac, Gal and GalNAc.

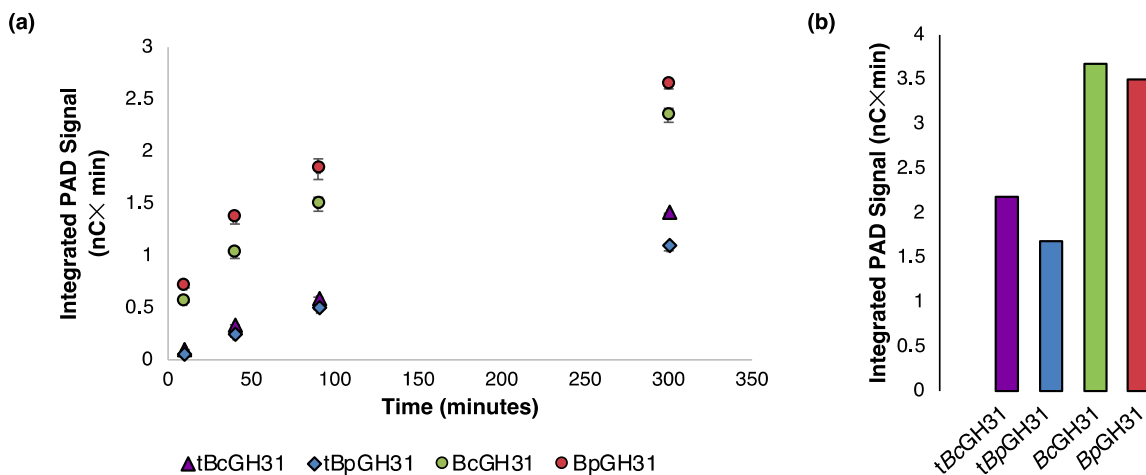

**Figure S5. Time-dependent cleavage of  $\alpha$ -GalNAc from fetuin.** (a) Fetuin pre-treated with NedA and BgaC was treated with equimolar amounts of truncated and full-length *BcGH31* and *BpGH31*. At different time points, cleavage products were then separated and analyzed via HPAEC-PAD. Error bars indicate standard error (n=2). (b) A similar procedure was carried out as in Panel A, however native fetuin was used and measurements were only conducted after four hours.

#### References:

1. Raussens, V., Ruyschaert, J.-M., and Goormaghtigh, E. (2003) Protein concentration is not an absolute prerequisite for the determination of secondary structure from circular dichroism spectra: a new scaling method. *Anal. Biochem.* **319**, 114–121
